# Supplementary material for: GTF2I dosage regulates neuronal differentiation and social behavior in 7q11.23 neurodevelopmental disorders
Source: PubMed Central journal article supplement — Sci Adv. 2023 Nov 29;9(48):eadh2726. doi: 10.1126/sciadv.adh2726 (PMC10686562; doi:10.1126/sciadv.adh2726), 2023-11-29
Supplement: sciadv.adh2726_sm.pdf [file sciadv.adh2726_sm.pdf]

Supplementary Materials for  
***GTF2I* dosage regulates neuronal differentiation and social behavior in  
7q11.23 neurodevelopmental disorders**

Alejandro López-Tobón *et al.*

Corresponding author: Giuseppe Testa, [giuseppe.testa@fht.org](mailto:giuseppe.testa@fht.org)

*Sci. Adv.* **9**, eadh2726 (2023)  
DOI: 10.1126/sciadv.adh2726

**This PDF file includes:**

Figs. S1 to S10  
Tables S1 to S3

# Supplementary Material

Figure S1

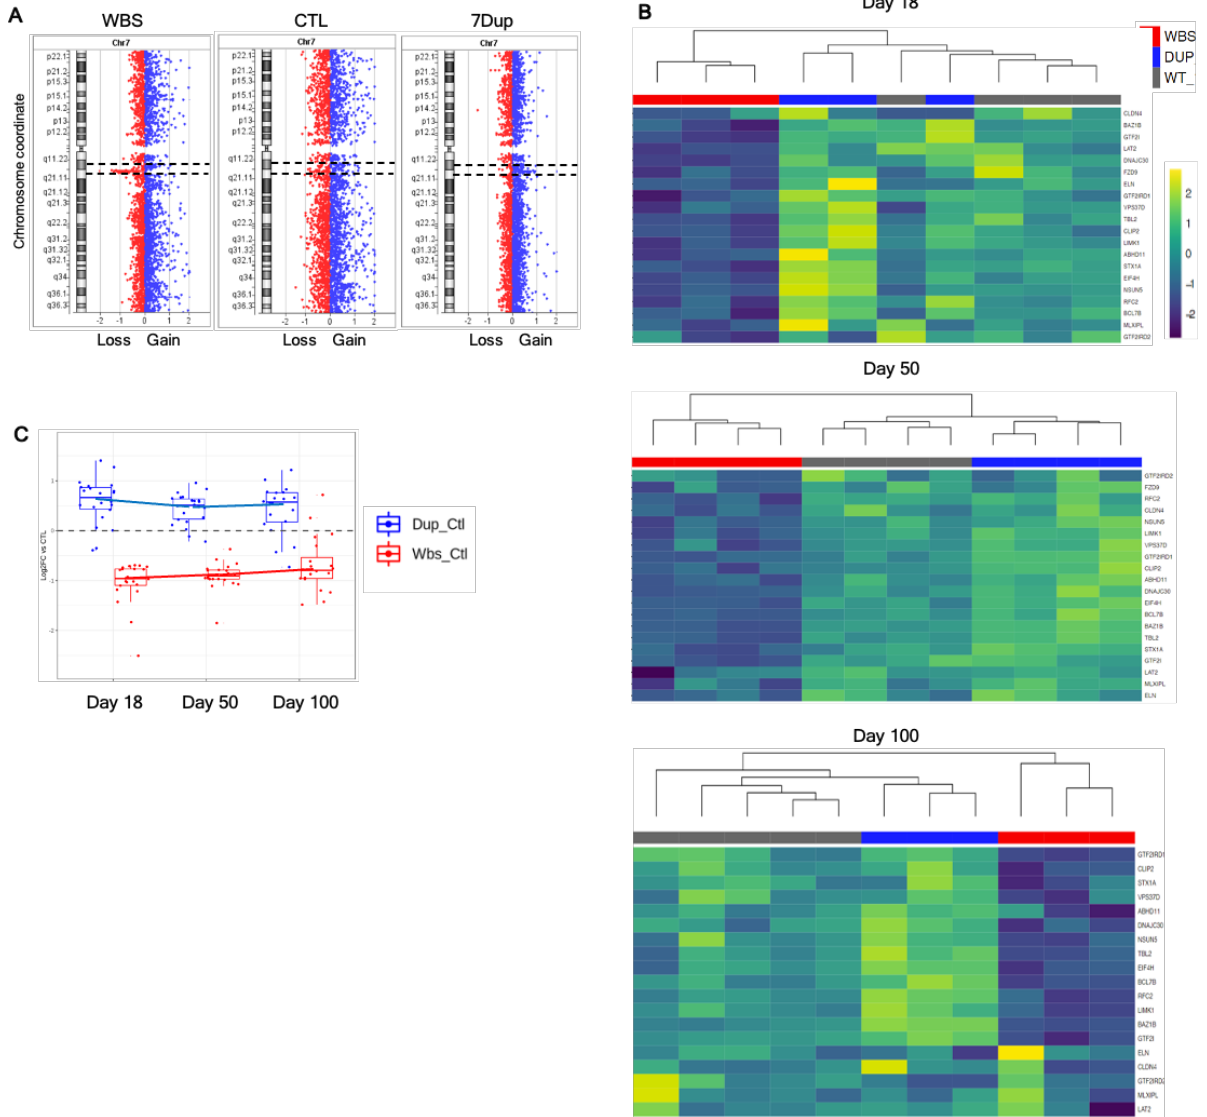

**Figure S1. Expression levels of 7q11.23 genes in cortical brain organoids**

(A) Array-CGH analysis for chromosome 7, representative of 1 iPSC line per genotype (WBS / CTL / 7DUP) dotted line highlights 7q11.23 locus. For details of the lines used in this study, refer to supplementary table 2. (B) Heatmaps reporting the expression levels of the genes located in the 7q11.23 CNV (z-score calculated on the Log2Cpm) from RNASeq transcriptome profiling in WBS, CTL and 7Dup cortical organoids at Day 18, Day 50 and Day 100 of differentiation. (C) Log2 fold-change of the genes located in the 7q11.23 CNV from stage-wise RNASeq differential expression analysis, comparing either WBS (in red) or 7Dup (in blue) to CTL. Each dot represents the log2FC value of a single gene of the region at a specific stage, while the boxplots summarize at each stage and in each genotype the overall behavior of the region. Trend lines connect the median for different stages of the same genotype.

Figure S2

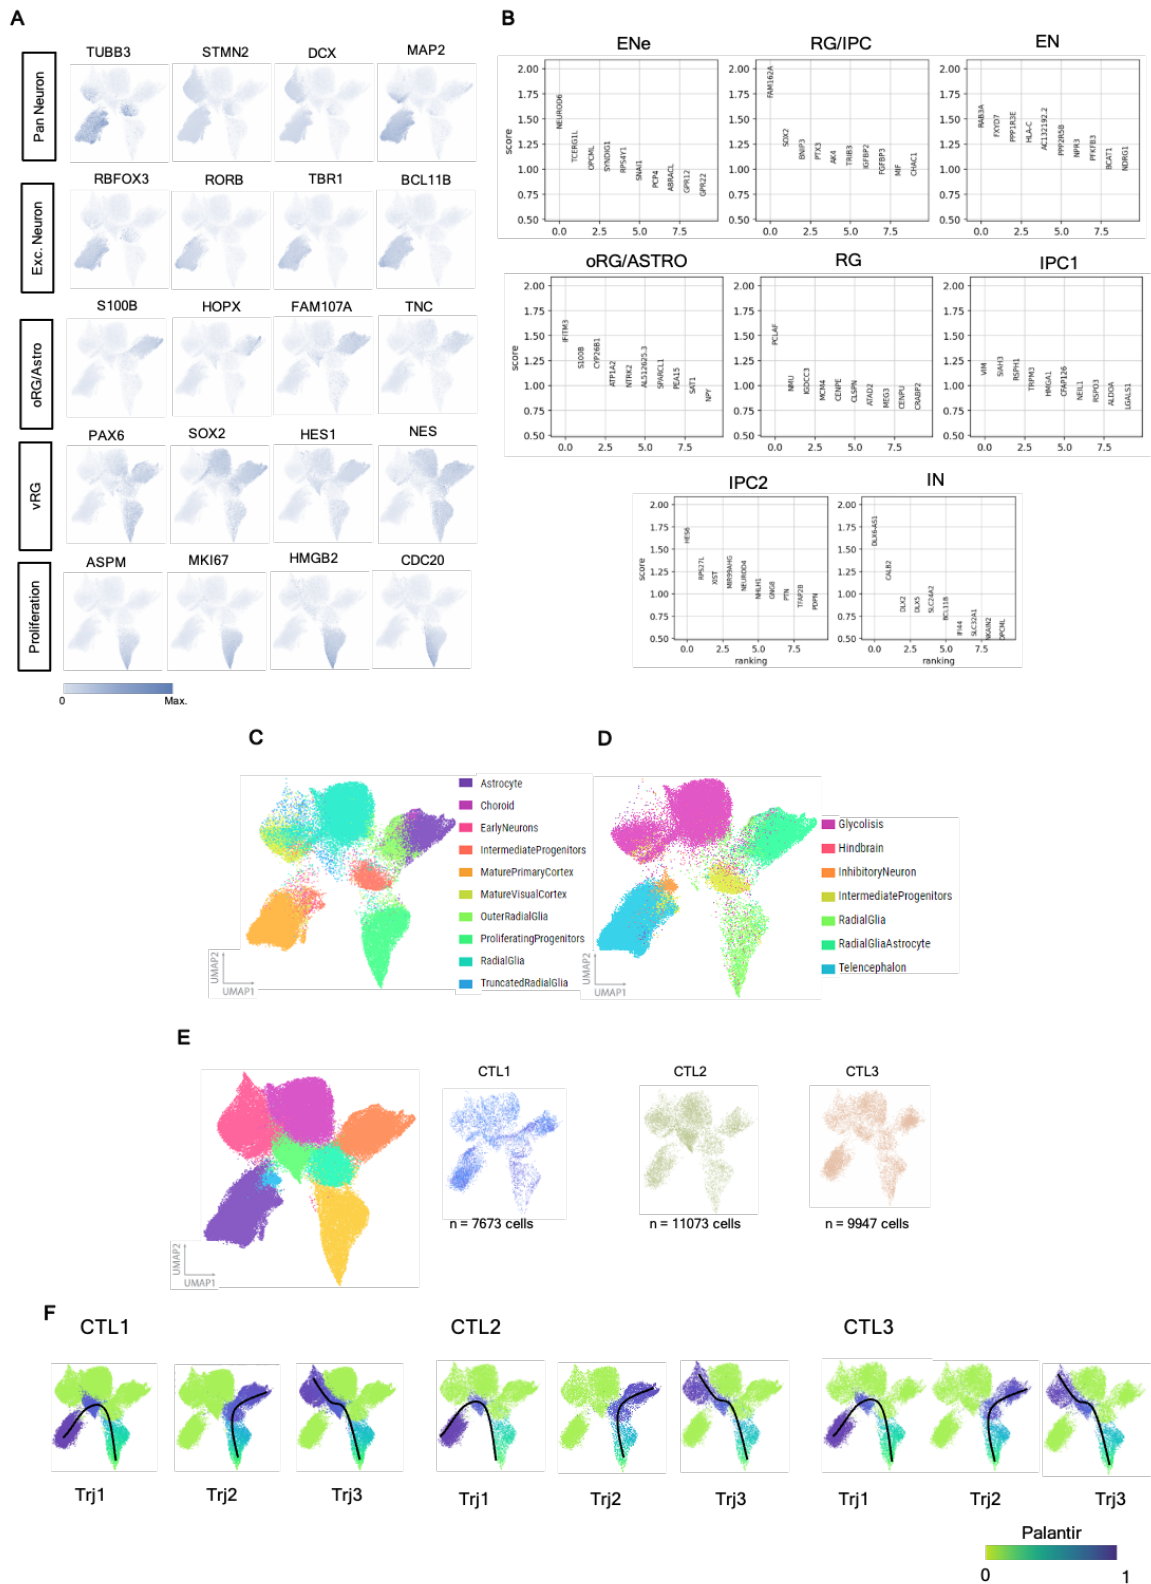

**Figure S2. Cortical brain organoids show prototypical cell populations of cortex development**

(A) Uniform manifold approximation and projection (UMAP) with color coded the most representative marker per population. (B) Top 10 marker genes for each identified cluster used for the manual annotations. (C-D) UMAP with color code representing automatically annotated cells using gene signature extracted from (30, 87) using SCINA (86). (E) UMAP with color code representing cell distribution in the UMAP among the 3 CTL lines. (F) UMAP with color code representing the 3 main differentiation trajectories, in all control genotypes are the same (Trj = Palantir trajectory).

Figure S3

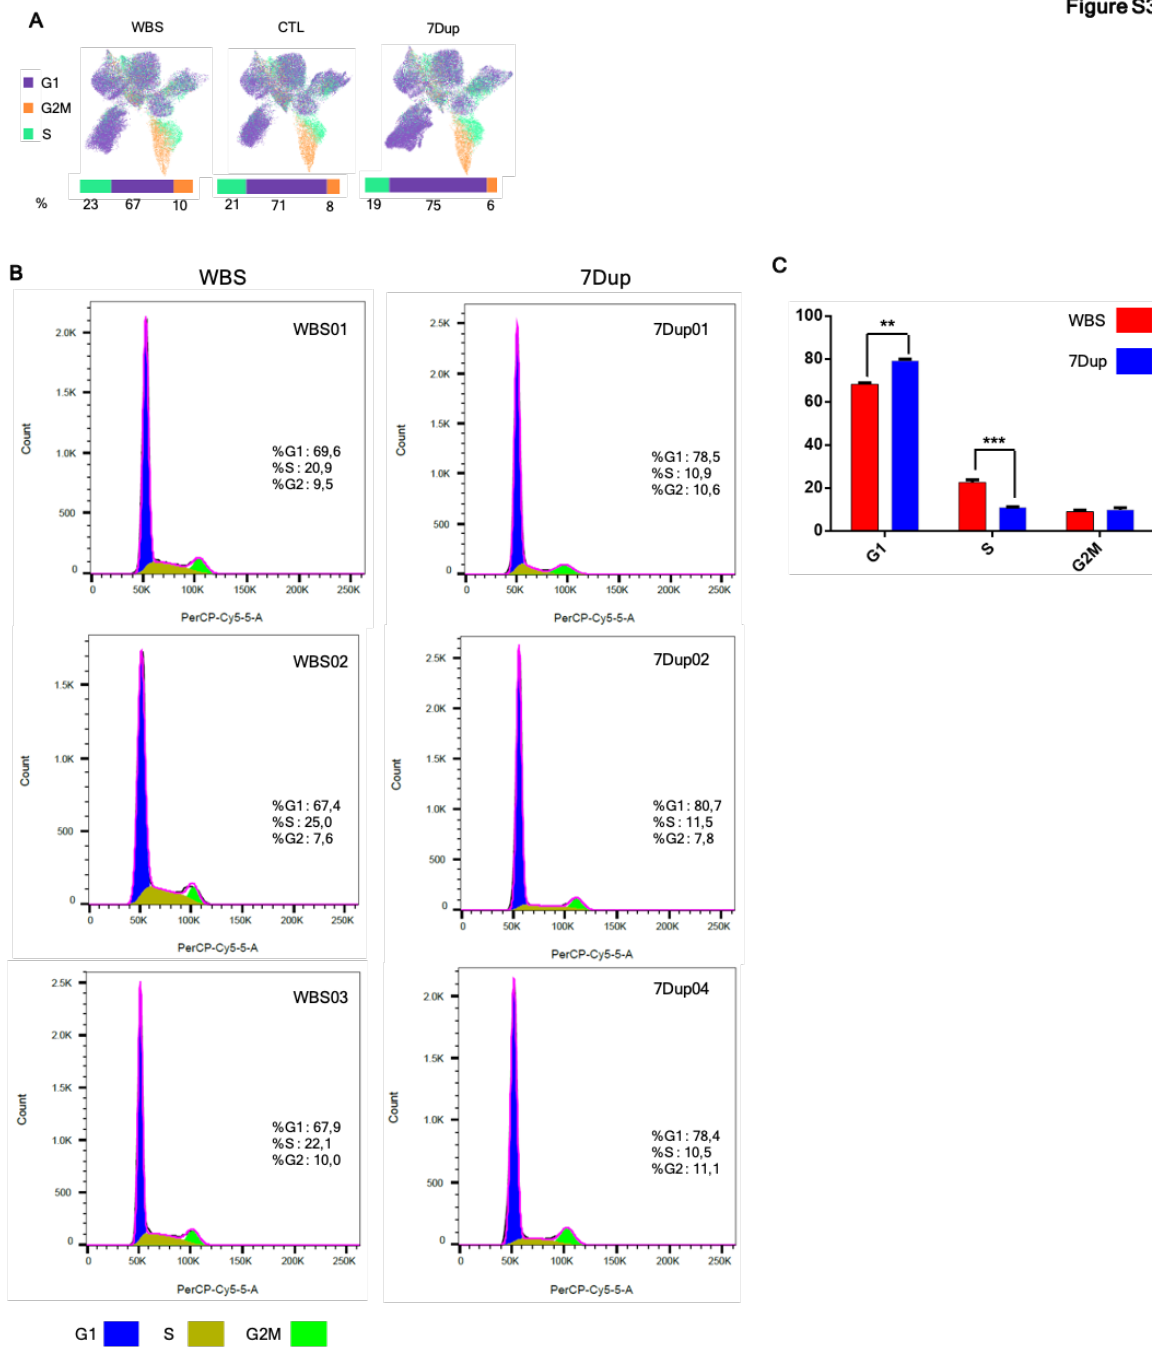

**Figure S3. Distribution of cell cycle phases in WBS and 7Dup COs**

(A) Percentage of total number of cells in each cell cycle phase and distribution in UMAP at day 50 stratified by condition. (B) Histogram plot of propidium iodine-stained single cells from Day 18 orgs quantified by flow cytometry comparing WBS and 7DUP samples from different individuals (WBS01, WBS02, WBS03 and 7DUP01, 7DUP02, 7DUP04). Each plot is representative of a pool of 3 organoids per individual. (N = 4 - WBS, 4- CTL and 4- 7Dup). Student's t-test comparing WBS and 7DUP using the aggregated percentages of 3 individuals per condition \*\*  $p > 0.01$  \*\*\*  $p > 0.005$ .

Figure S4

A

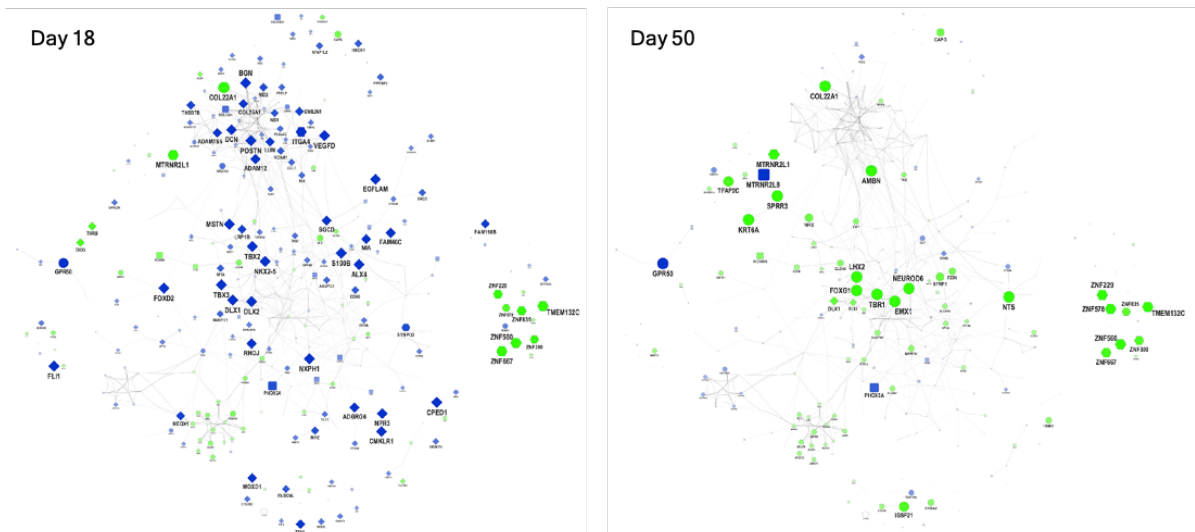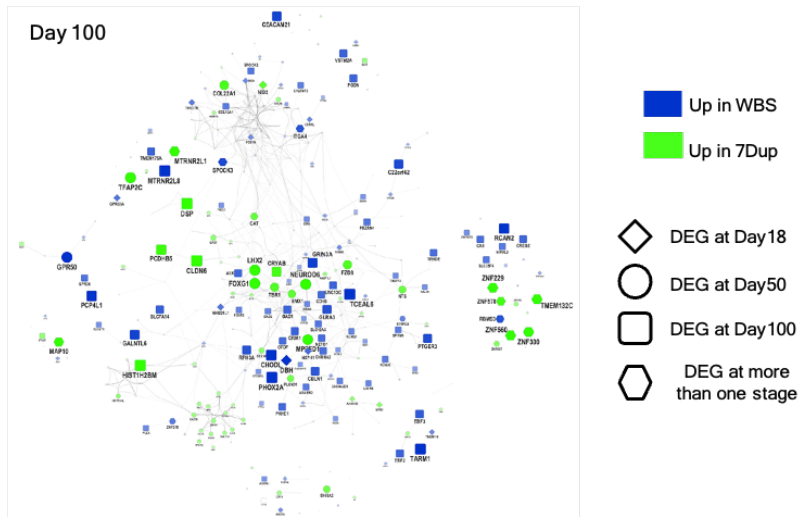

B

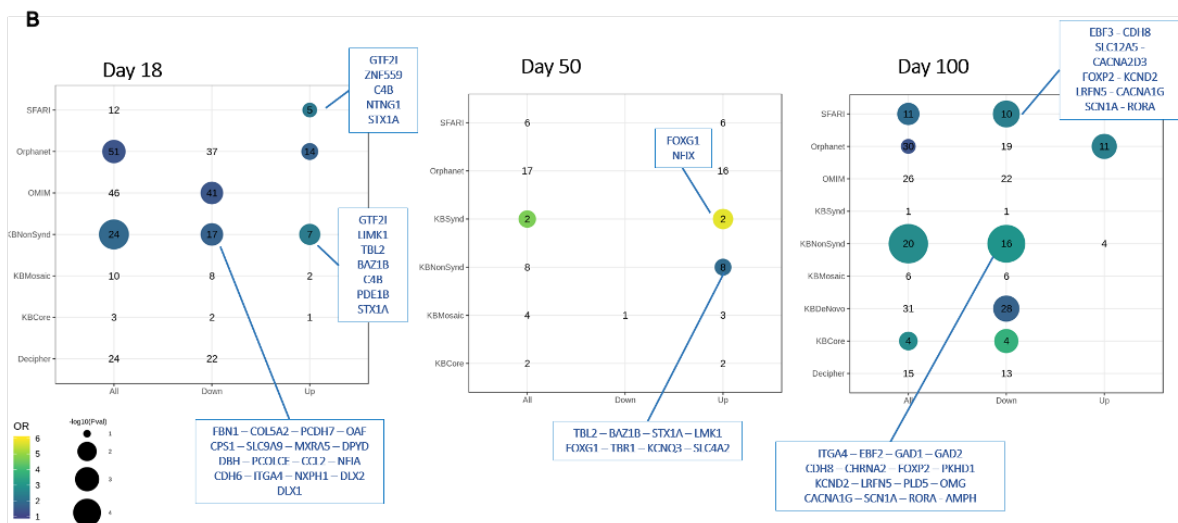



**Figure S4. Genes modulated by 7q11.23 gene dosage imbalance significantly overlap with disease-related knowledge bases**

(A) STRING-based (<https://string-db.org/>) network reconstructed for the genes found modulated ( $FDR < 0.1$ ,  $\log_2FC > 1$ ) in at least one time-point by stage-wise differential expression analysis. At each examined stage, node (gene) size and color represent respectively the magnitude and direction of  $\log_2FC$ , with genes more expressed in 7Dup and WBS in green and blue respectively. Across the three visualizations, node shape highlights the stage in which the genes are significantly modulated: diamond for Day 18, circle for Day 50, square for Day100 and hexagon for genes significant in more than one stage. (B) Dotplot showing the results of the overlap analysis between genes differentially expressed in 7Dup compared to WBS and disease-related knowledge bases. DEGs ( $FDR < 0.1$ ,  $\log_2FC > 1$  as absolute value, stage-wise DEA in cortical organoids) are analyzed either grouped or split in up- and down-regulated. The plot reports the number of overlapping genes for Odds Ratio (OR)  $> 1$  and the dot for p-values  $< 0.1$ . Dot size and color represent the p-value and the OR respectively.

Figure S5

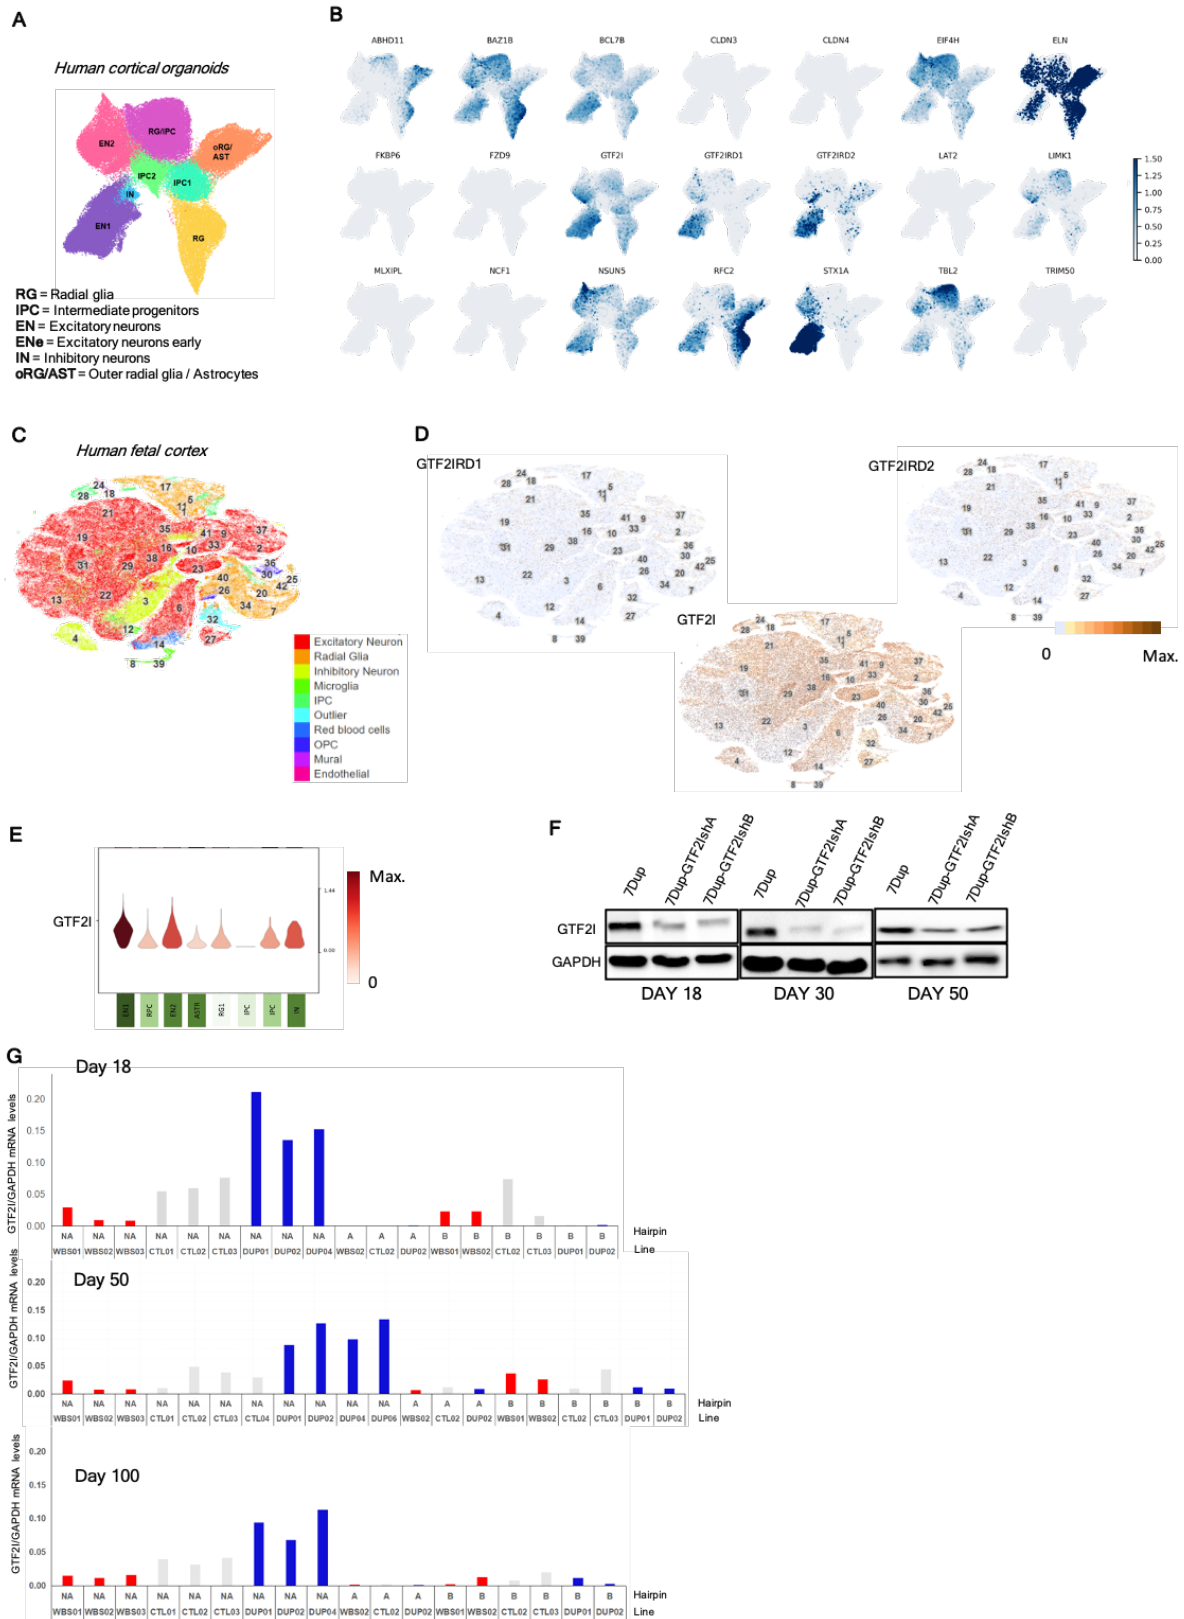

**Figure S5. *GTF2I* expression levels in fetal brain and cortical organoid**

(A) UMAP with color coded the identified populations (as shown in Fig. 1B). (B) UMAP showing expression levels in control COs for genes in the 7q11.23 locus (missing genes are absent in the integration matrix). (C) Seurat tSNE showing the population annotation from nearly 200,000 primary cells sampled from GW6-22 from seven cortical regions, including PFC, V1, motor, somatosensory, temporal, parietal and hippocampus. Annotation taken from the UCSC cell data browser. Cell Browser dataset ID: organoidreportcard/primary10X. Public dataset published here: (91) (D) Expression levels in human fetal primary brain cells for *GTF2I*, *GTF2IRD1* and *GTF2IRD2*. (E) Breakdown of expression levels in control in COs for *GTF2I* between different populations from a single cell dataset. (F) Western blot showing the downregulation of *GTF2I* using two different short hairpins respectively, at Day 18, 30 and 50, using *GAPDH* as loading control. Each lane is representative from a pool of n = 3 organoids/cell line, 2 cell lines/genotype. (G) Expression levels of *GTF2I* in COs at Days 18, 30 and 50 by quantitative RT-PCR. Values are expressed as normalized expression over the average for *GAPDH* levels. Each bar represents a pool of n = 3 organoids from a single organoid line.

Figure S6

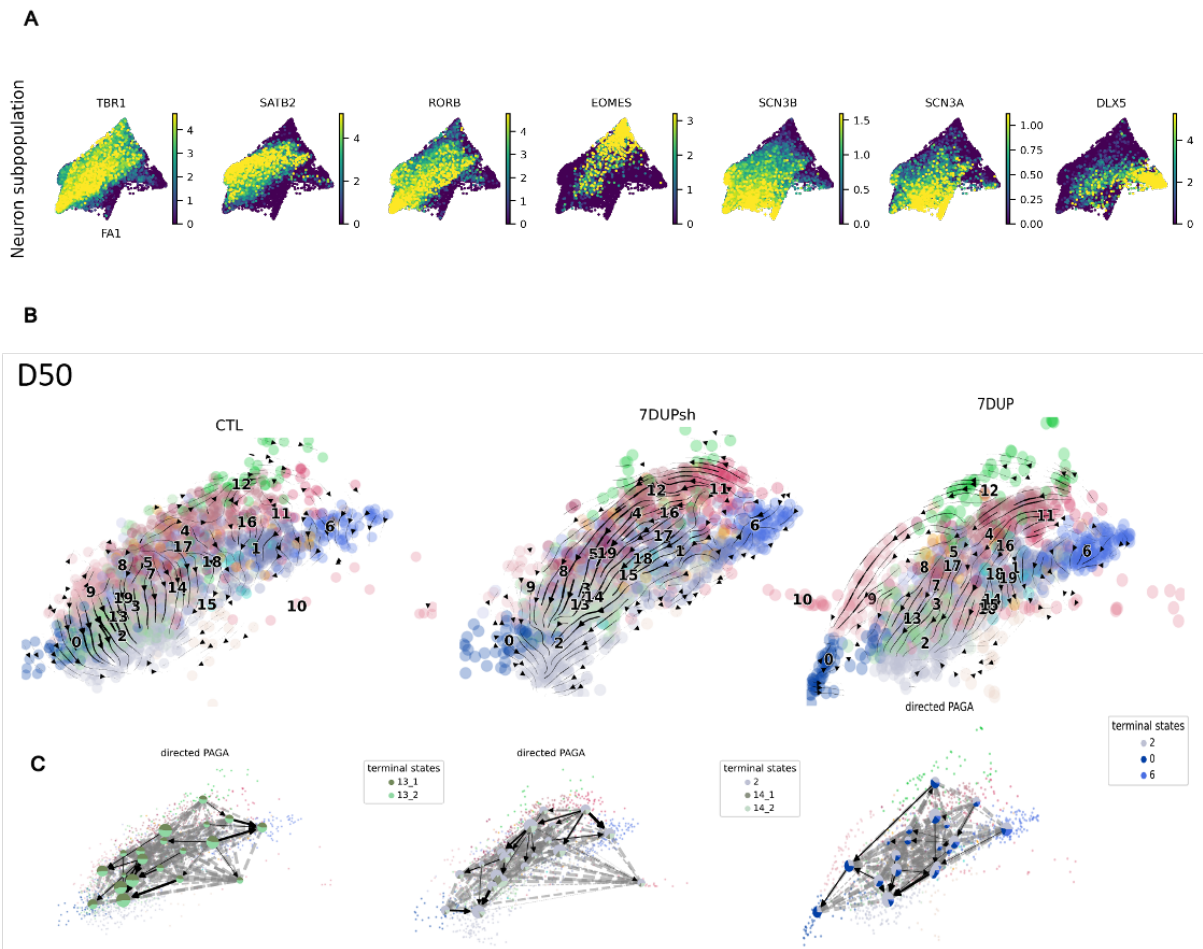

**Figure S6. Gene dosage imbalances at 7q11.23 dysregulated normal differentiation trajectory at D50 and partial rescue by the knockdown of *GTF2I***

(A) Force-directed graph stratified for genotype (CTL, 7Dupsh*GTF2I* and 7Dup) from left to right at D50, with color coded the identified subpopulations. The arrow defines the inferred differentiation trajectory identified by Velocity. (B) PAGA with position identified by force-directed graph subpopulations location. Color code identifies the number of cells per cluster that will be most probably going in the identified terminal state.

Figure S7

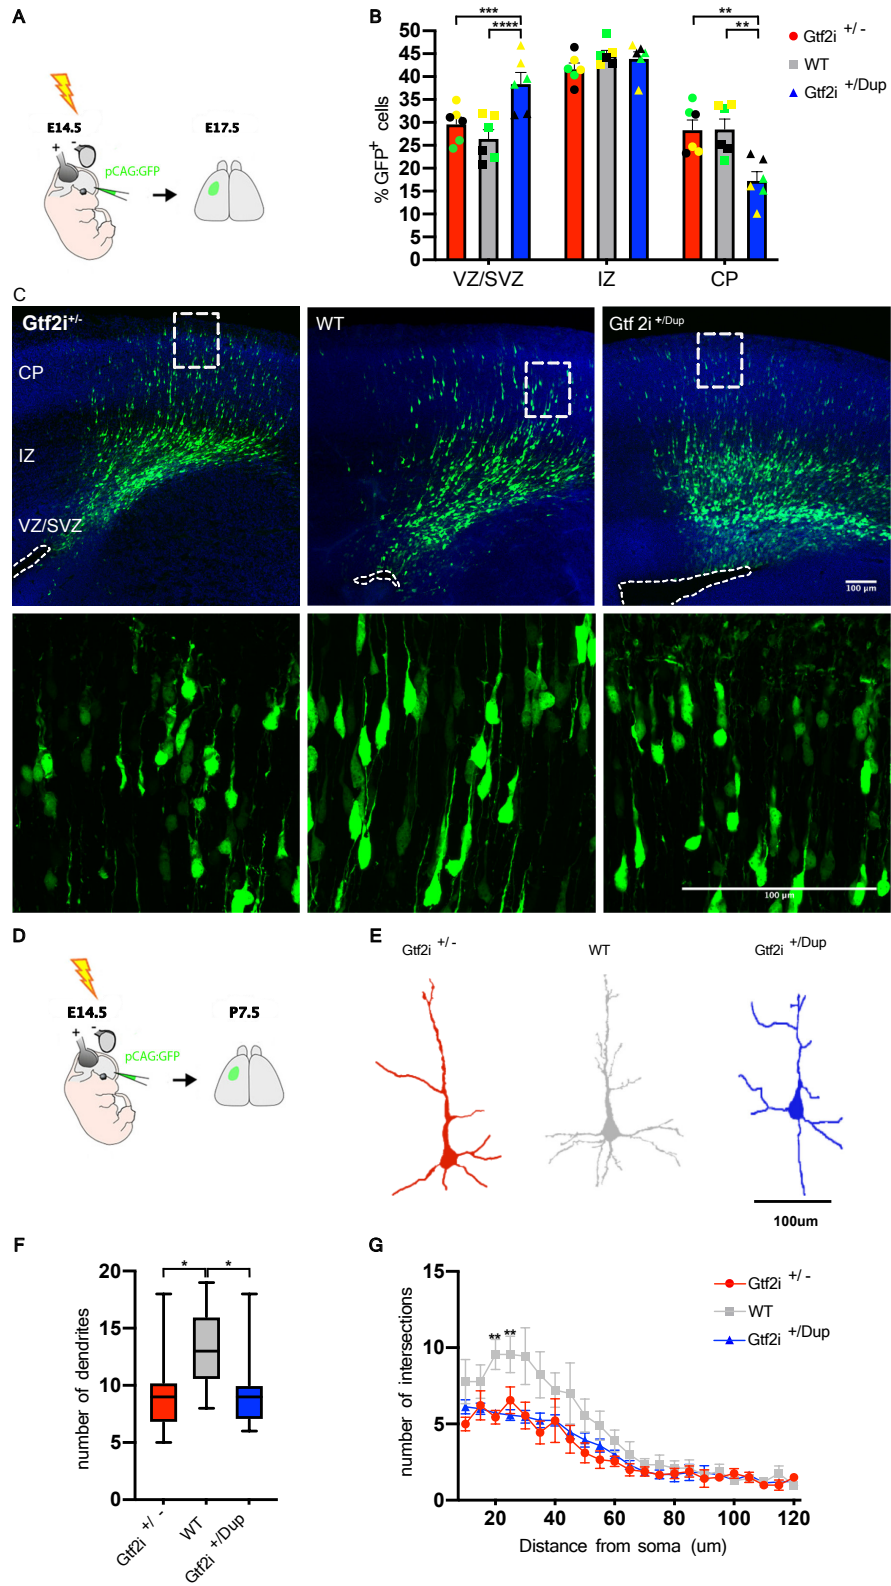

**Figure S7. *Gtf2i* dosage affect neuronal migration and neuronal morphology in mouse cortex**

(A) Schematic representation of *in utero* electroporation experiments. Mice were electroporated at E14.5 and analysed at E17.5. (B) Bar diagram depicting neuronal migration defects in *Gtf2i*<sup>+<sup>+</sup>Dup</sup> mice. Note the difference between the increased number of GFP<sup>+</sup> neuronal progenitors in VZ/SVZ and reduced number of GFP<sup>+</sup> neurons in CP. *Gtf2i*<sup>+/-</sup>, WT, *Gtf2i*<sup>+<sup>+</sup>Dup</sup>; n=6 sections from 3 mice/group. Same color shapes denote sections from the same mouse. Data shown as mean±SEM. Mixed linear regression model considering sections of the same cortical area (VZ, IZ, CP) as replicates from the same mouse/sample (~individual+genotype), and different brain regions as covariate (~individual+region+genotype). Significance level was set to p<0.05. \*p<0.05; \*\*p<0.01; \*\*\*p<0.001; \*\*\*\*p<0.0001. (C) (Upper panel) Representative images of electroporated brains from *Gtf2i*<sup>+/-</sup>, WT and *Gtf2i*<sup>+<sup>+</sup>Dup</sup> mice at E17.5. (Lower panel) Insets of upper panel figures showing GFP<sup>+</sup> neurons in CP. (D) Schematic representation of *in utero* electroporation experiments. Mice were electroporated at E14.5 and analyzed at P7.5. (E). Representative morphology of cortical neurons from *Gtf2i*<sup>+/-</sup>, WT and *Gtf2i*<sup>+<sup>+</sup>Dup</sup> mice at P7.5. (F) Box plot showing reduced number of dendrites in mutant mice compared to WT. *Gtf2i*<sup>+/-</sup>, n=10 neurons from 3 mice; WT, n=9 from 4 mice; *Gtf2i*<sup>+<sup>+</sup>Dup</sup>, n=15 from 5 mice. Kruskal-Wallis followed by Dunn's multiple comparisons test. (G). Plot showing number of intersections from Sholl analysis. *Gtf2i*<sup>+/-</sup>, n=19 neurons from 3 mice; WT, n=9 from 4 mice; *Gtf2i*<sup>+<sup>+</sup>Dup</sup>, n=15 from 5 mice. Data shown as mean±SEM. Kruskal-Wallis followed by Dunn's multiple comparisons test. Significance level was set to p<0.05. \*p<0.05; \*\*p<0.01.

Figure S8

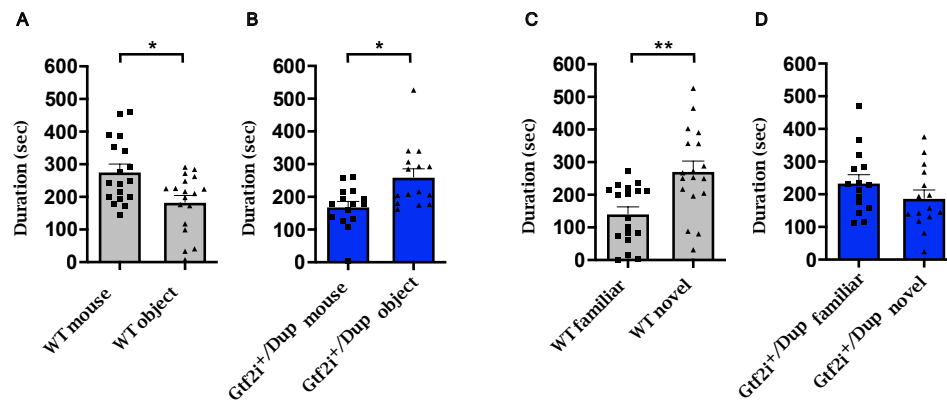



**Figure S8. *Gtf2i* duplication causes social preference impairments in female mice**

Bar plots with dots depicting the quantification of social preference (**A, B**) and social novelty (**C, D**) in female Wt (n=18) and *Gtf2i*<sup>+/<sup>Dup</sup> mice (n=15). Statistical analyses were performed using paired Student's t-test followed by Holm-Bonferroni correction for multiple testing. Significance level p<0.05. \*p<0.05; \*\*p<0.01.</sup>

Figure S9

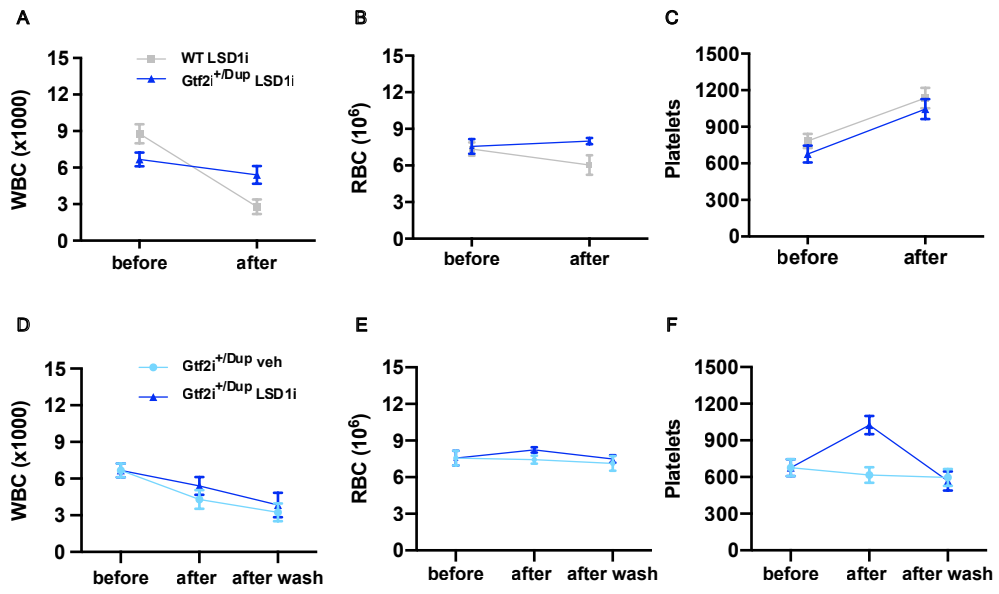

**Figure S9. Blood factors remain within normal range following LSD1 inhibitor administration**

(A-C) Line charts depicting values respectively, of white blood cell (WBC), red blood cells (RBC) and platelets before (Wt n=18; *Gtf2i*<sup>+Dup</sup> n=16), and after (Wt n=8; *Gtf2i*<sup>+Dup</sup> n=21) administration of LSD1 inhibitor. (D-F) Line charts depicting values respectively, of WBC, RBC and platelets in *Gtf2i*<sup>+Dup</sup> mice before (n=16), after administration of LSD1 inhibitor or vehicle (LSD1i n=21, vehicle; n=16), and after drug 'washout' (LSD1i; n=13; vehicle; n=11).

Figure 10

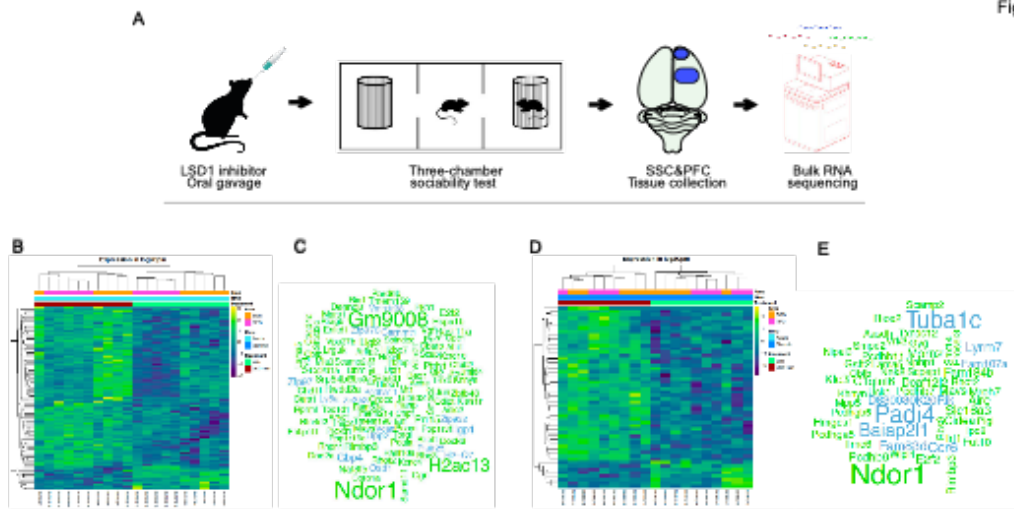

**Figure S10. LSD1 inhibition affects neurodevelopment and synaptic organization in the cortex of *Gtf2i*<sup>+ / Dup</sup> mice**

(A) Schematic representation of the experimental flow. *Gtf2i*<sup>+ / Dup</sup> mice received either a single (acute) or 2 administrations of LSD1 inhibitor/week over 2 weeks (semi-chronic) followed by three-chambered sociability test. *Prefrontal* (PFC) and *somatosensory* (SSC) cortices were dissected, flash frozen and RNA extracted for bulk transcriptomic profiling. (B-C) Heatmap and word cloud respectively depicting the expression levels (as z-scores) and gene symbol (green: up-regulated; blue: down-regulated) of the 114 genes identified as DEGs following a single administration of LSD1 inhibitor compared to vehicle in pre-frontal and somatosensory cortex. Vehicle, n=5 mice and LSD1 inhibitor, n=5 for both cortical areas. (D-E) Chronic administration of LSD1 inhibitor results in 54 DEGs as shown in the heatmap and the word cloud. Genes from the protocadherins family were prominently upregulated as a result of chronic LSD1 inhibition. Note in both acute and chronic paradigms, the upregulation of most genes after inhibition of the transcriptional suppressor LSD1. Vehicle, n=5 mice for both areas; LSD1 inhibitor, n=5 mice for SSC and n=4 mice for PFC.

**Supplementary Tables**

Table S1. Antibodies dilutions

| Antibodies | Vendor | Product number | Application | Concentration |
|------------|--------|----------------|-------------|---------------|
| Pff3       | Abcam  | ab5169         | IF          | 1:250         |

|               |                   |          |    |         |
|---------------|-------------------|----------|----|---------|
| <b>Ki67</b>   | Abcam             | ab15580  | IF | 1:500   |
| <b>Tbr2</b>   | Abcam             | ab23345  | IF | 1:500   |
| <b>Pax6</b>   | Biolegend         | 901301   | IF | 1:300   |
| <b>Tbr1</b>   | Abcam             | ab31940  | IF | 1:250   |
| <b>Bcl11b</b> | Abcam             | ab18465  | IF | 1:500   |
| <b>Cux1</b>   | Santa Cruz        | sc-13024 | IF | 1:500   |
| <b>Gfap</b>   | Abcam             | ab53554  | IF | 1:500   |
| <b>Gtf2i</b>  | BD<br>Biosciences | 610942   | WB | 1:3000  |
| <b>Gapdh</b>  | Millipore         | ABS16    | WB | 1:10000 |

---

**Table S2. iPSC lines used in each experiment**

| Cell line | Gender | Age | Kinship | Experiment | Reference |
|-----------|--------|-----|---------|------------|-----------|
|-----------|--------|-----|---------|------------|-----------|

|       |   |                 |                 |                                             |      |
|-------|---|-----------------|-----------------|---------------------------------------------|------|
| WBS01 | M |                 | Son of CTL01    | Bulk and single cell RNAseq, IF, Proteomics | (11) |
| WBS02 | F |                 | -               | Bulk and single cell RNAseq, IF, Proteomics | (11) |
| WBS03 | F |                 | -               | Bulk and single cell RNAseq, IF, Proteomics | (11) |
| WBS04 | M |                 | -               | Bulk and single cell RNAseq                 | (11) |
| CTL01 | F |                 | Mother of WBS01 | Bulk and single cell RNAseq, IF, Proteomics | (11) |
| CTL02 | M | Neonate         |                 | Bulk and single cell RNAseq, IF, Proteomics | (11) |
| CTL08 | M | 55-59 years old |                 | Bulk and single cell RNAseq, IF, Proteomics |      |
| CTL04 | F |                 |                 | Bulk and single cell RNAseq                 |      |
| CTL09 | M |                 |                 | Bulk RNAseq                                 |      |
| DUP01 | M |                 |                 | Bulk and single cell RNAseq, IF, Proteomics | (11) |
| DUP02 | F |                 |                 | Bulk and single cell RNAseq,                | (11) |

|       |   |                |                        |                                                         |     |
|-------|---|----------------|------------------------|---------------------------------------------------------|-----|
|       |   |                |                        | IF,<br>Proteomics                                       |     |
| DUP04 | M | 4 years<br>old | Sibling<br>of<br>DUP06 | Bulk and<br>single cell<br>RNAseq,<br>IF,<br>Proteomics | (3) |
| DUP06 | M | 9 years<br>old | Sibling<br>of<br>DUP04 | Bulk and<br>single cell<br>RNAseq                       | (3) |

**Table S3. Collection timepoints for each experiment with cortical organoids**

| Experiment / Cell line | Day 18 | Day 50 | Day 100 |
|------------------------|--------|--------|---------|
| Bulk RNAseq            | X      | X      | X       |
| scRNAseq               |        | X      | X       |
| Immunostaining         |        | X      | X       |
| Proteomics             |        | X      |         |
| Flow Cytometry         | X      |        |         |
